# Supplementary material for: Solvent effect on simple and high yield synthesis of polydichlorophosphazene precursor Cl3PNSiMe3
Source: Royal Society of Chemistry journal article supplement (doi:10.1039/d1nj03721h), 2021-01-01
Supplement: d1nj03721h1.pdf [file d1nj03721h1.pdf]

## Supporting Information

### Solvent Effect on Simple and High Yield Synthesis of Polydichlorophosphazene Precursor $\text{Cl}_3\text{P}=\text{NSiMe}_3$

Elif Büşra ÇELEBİ,<sup>a</sup> and Ferda HACIVELİOĞLU\*<sup>a, b, c</sup>

#### CONTENTS

|                   |                                                                                                                                                                                                                                                                           |          |
|-------------------|---------------------------------------------------------------------------------------------------------------------------------------------------------------------------------------------------------------------------------------------------------------------------|----------|
| <b>Figure S1.</b> | <sup>31</sup> P- <sup>31</sup> P COSY NMR result of the reaction mixture given in Figure 3a.                                                                                                                                                                              | <b>2</b> |
| <b>Figure S2.</b> | <sup>31</sup> P NMR results of PCl <sub>5</sub> (3eq.) with HMDS (4eq.) reaction in <b>a)</b> n-pentane, <b>b)</b> n-hexane, and <b>c)</b> benzene at 0°C.                                                                                                                | <b>3</b> |
| <b>Figure S3.</b> | <b>a)</b> <sup>1</sup> H NMR, <b>b)</b> <sup>31</sup> P NMR, <b>c)</b> <sup>29</sup> Si NMR and <b>d)</b> <sup>13</sup> C NMR of isolated Cl <sub>3</sub> P=NSiMe <sub>3</sub> .                                                                                          | <b>4</b> |
| <b>Figure S4.</b> | <sup>31</sup> P NMR result from the experiment where the toluene solution of PCl <sub>5</sub> (3eq.) is slowly added to HMDS (4eq.) solution cooled to 0°C.                                                                                                               | <b>5</b> |
| <b>Figure S5.</b> | <sup>1</sup> H NMR monitoring result of the condensation polymerisation of Cl <sub>3</sub> P=NSiMe <sub>3</sub> in the toluene reaction mixture at room temperature, <b>a)</b> 30 <sup>th</sup> min., <b>b)</b> 60 <sup>th</sup> min. and <b>c)</b> 90 <sup>th</sup> min. | <b>6</b> |

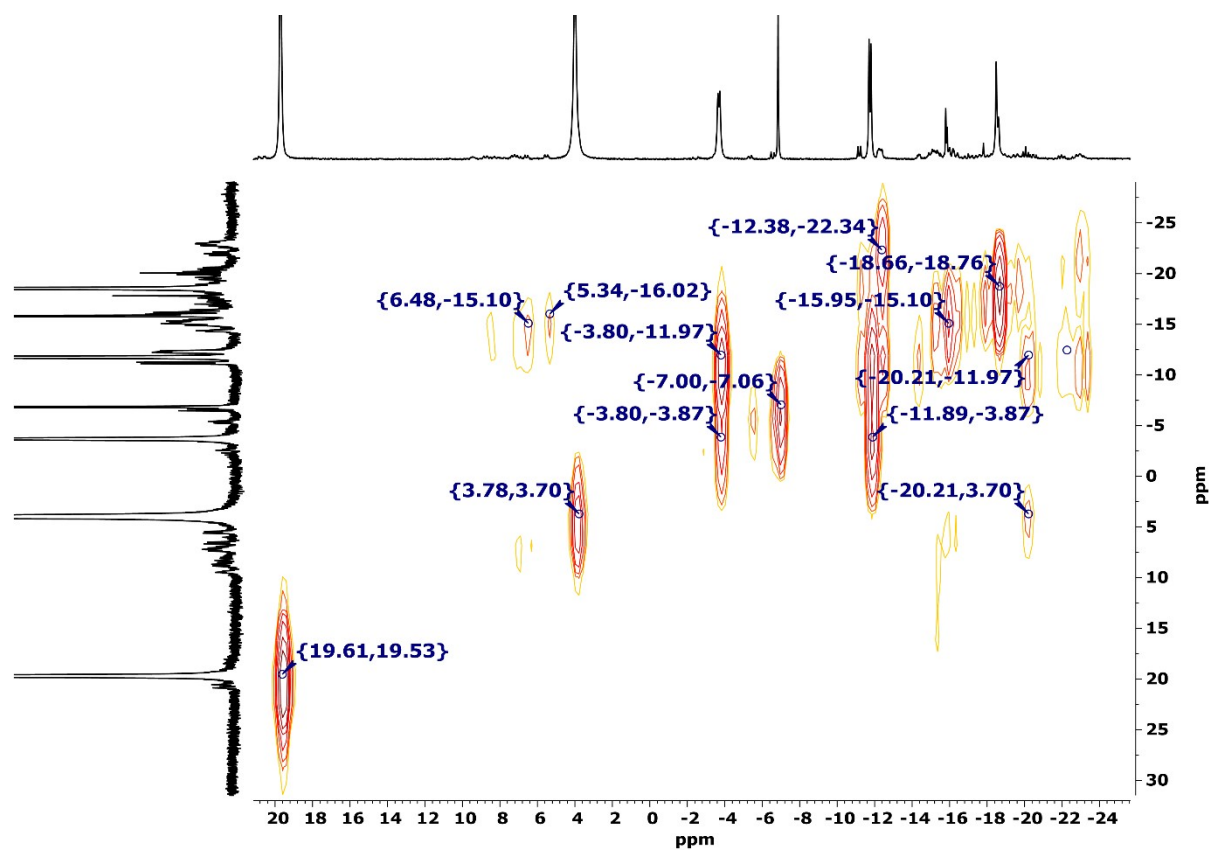

**Figure S1.**  $^{31}\text{P}$ - $^{31}\text{P}$  COSY NMR result of the reaction mixture given in Figure 3a.

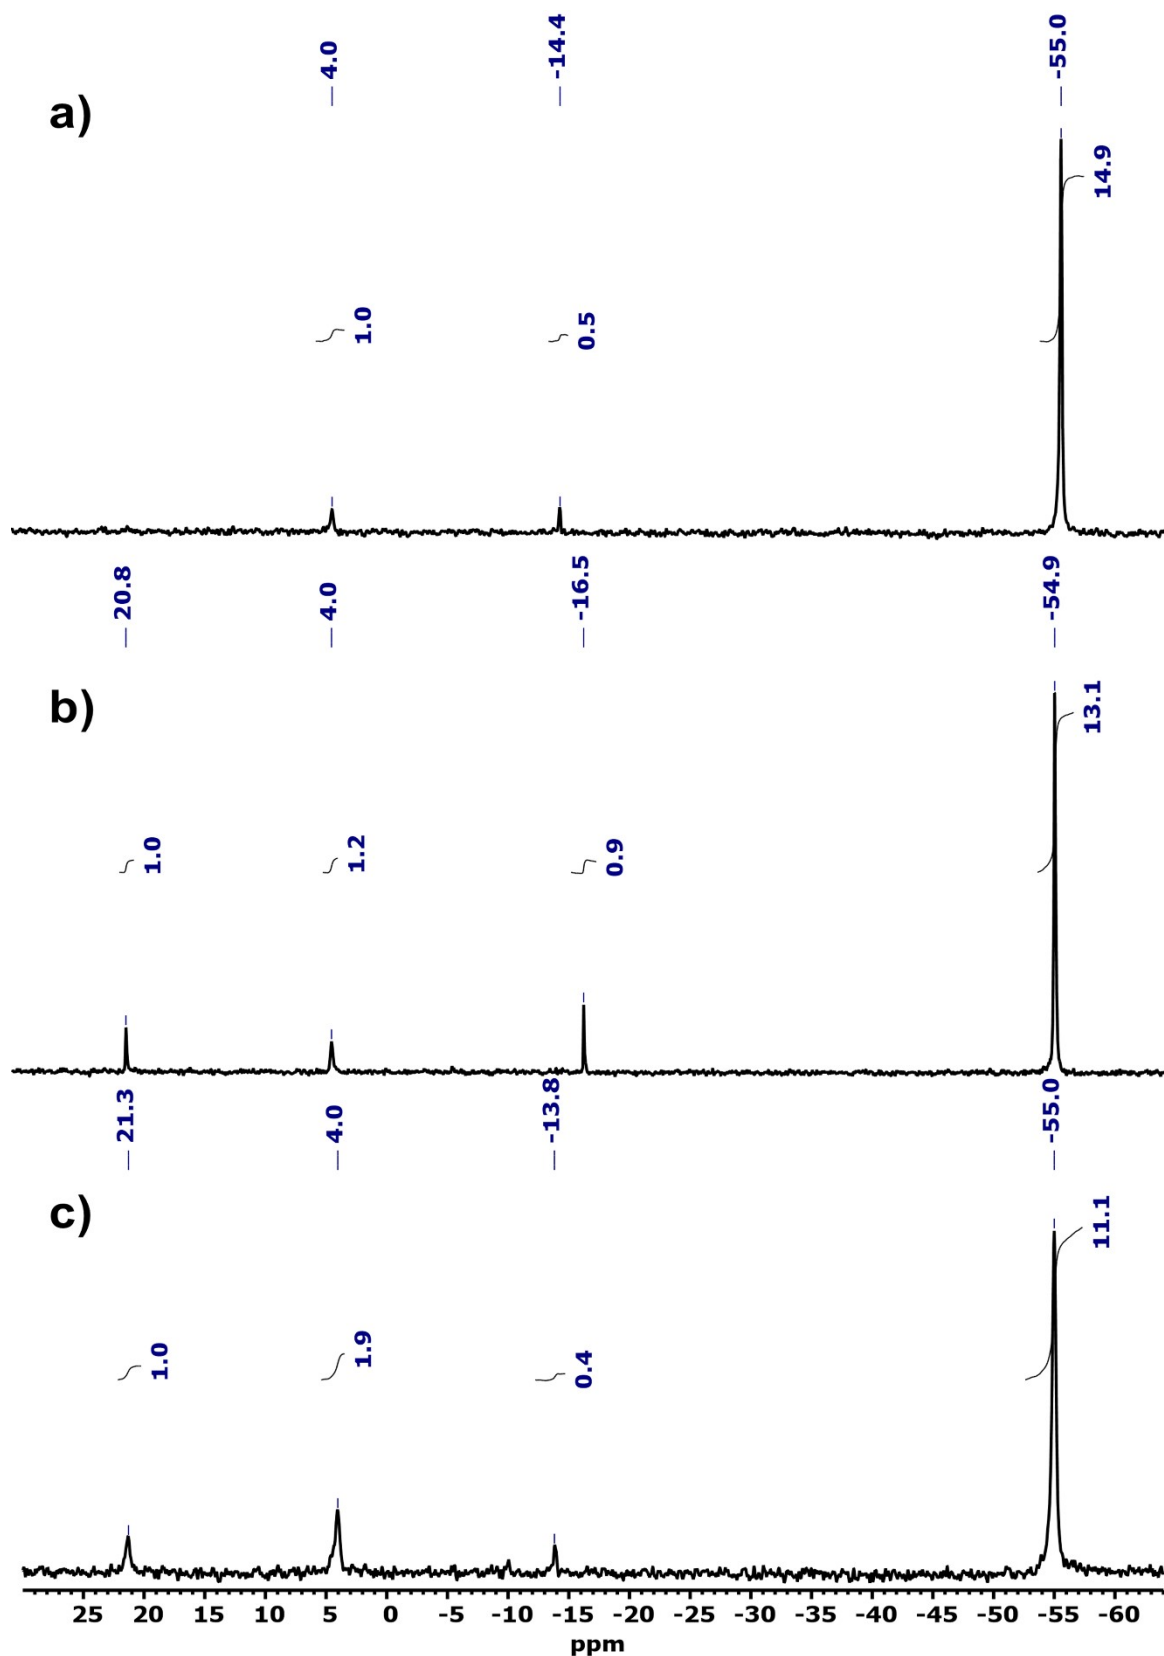

**Figure S2.**  $^{31}\text{P}$  NMR results of  $\text{PCl}_5$  (3eq.) with HMDS (4eq.) reaction in **a)** n-pentane, **b)** n-hexane, and **c)** benzene at  $0^\circ\text{C}$ .

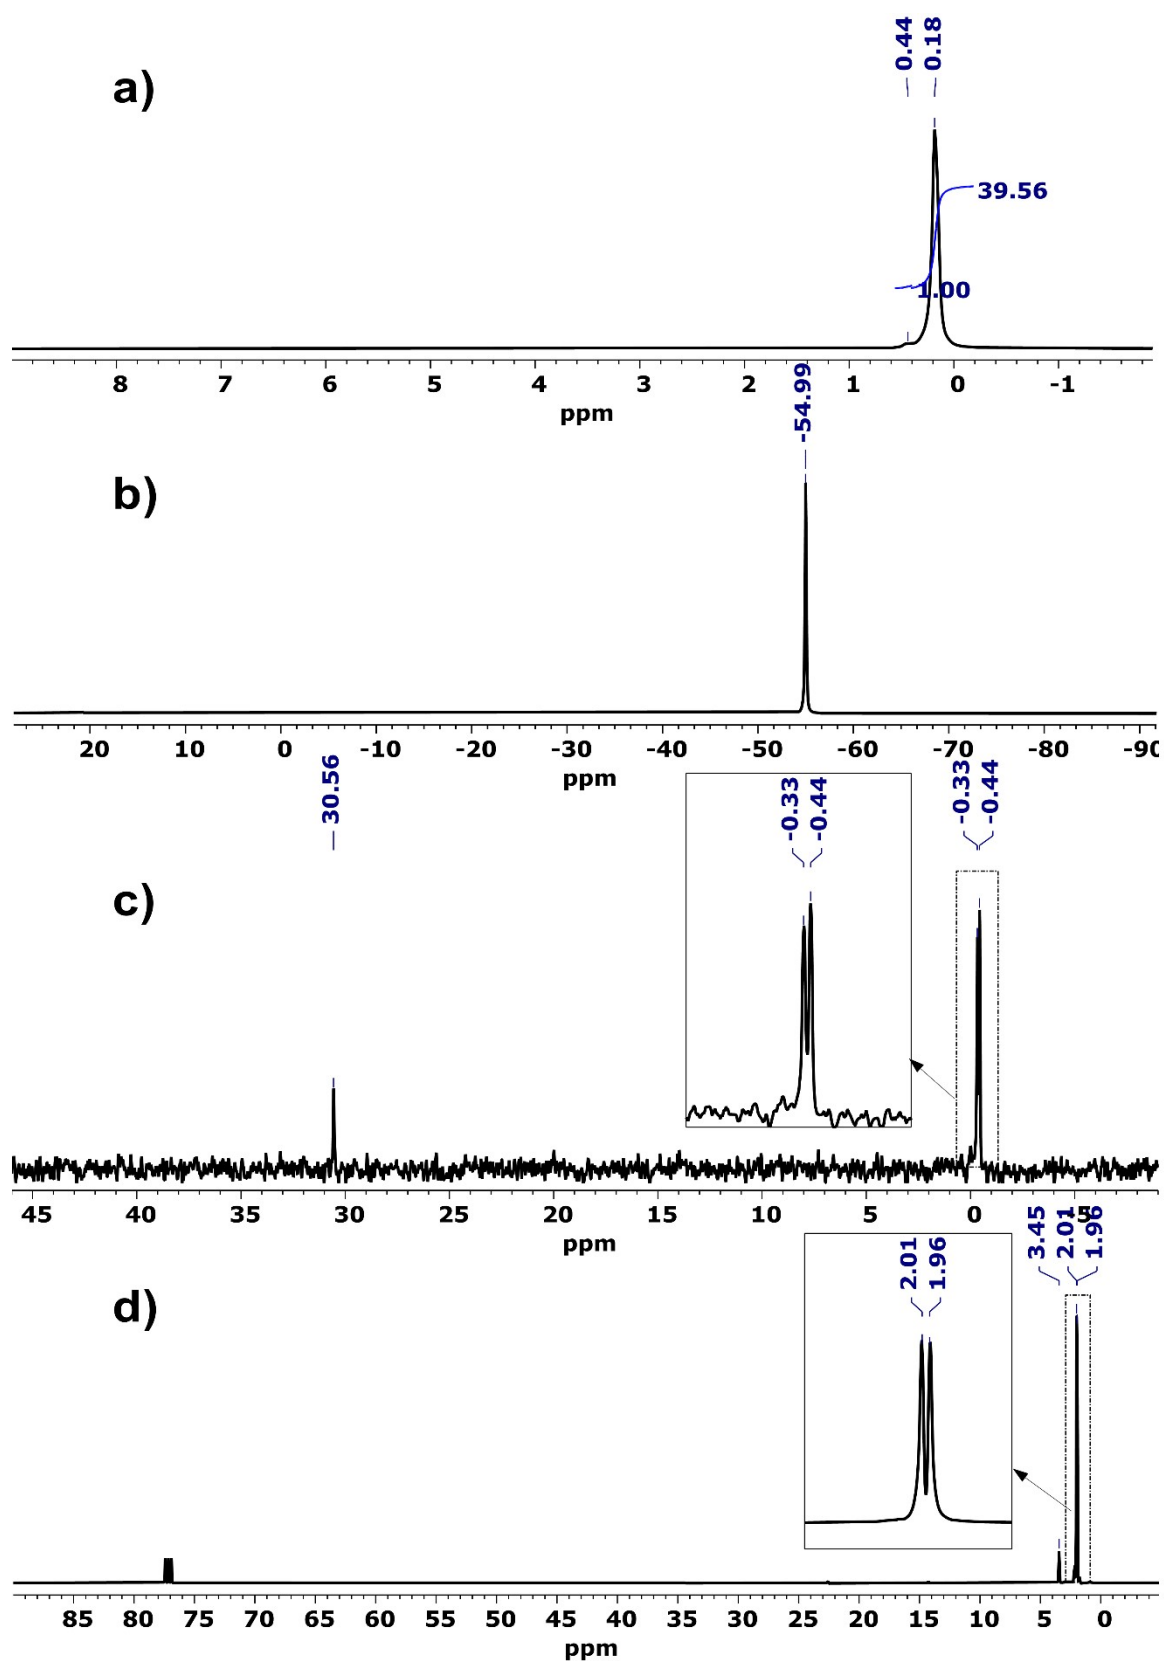

Figure S3. a)  $^1\text{H}$  NMR, b)  $^{31}\text{P}$  NMR, c)  $^{29}\text{Si}$  NMR and d)  $^{13}\text{C}$  NMR of isolated  $\text{Cl}_3\text{P}=\text{NSiMe}_3$

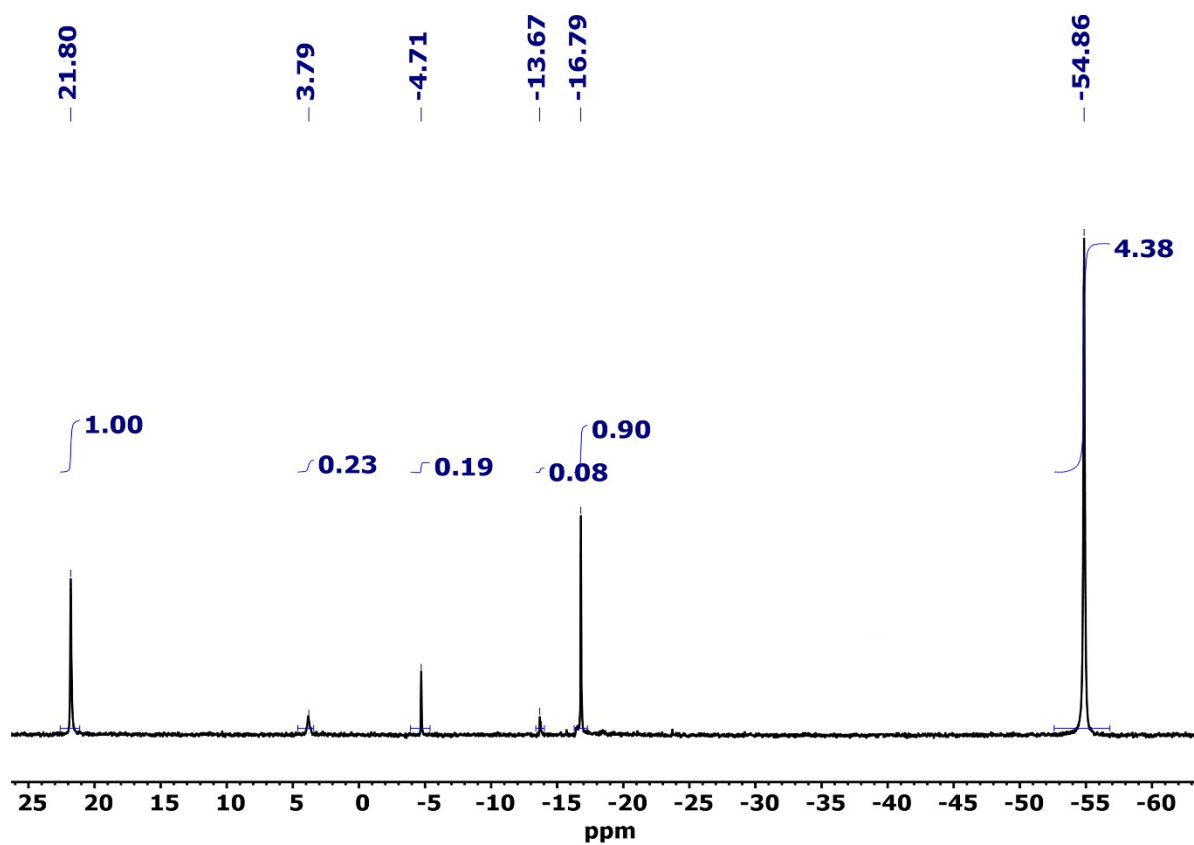

**Figure S4.**  $^{31}\text{P}$  NMR result from the experiment where the toluene solution of  $\text{PCl}_5$  (3eq.) is slowly added to HMDS (4eq.) solution cooled to  $0^\circ\text{C}$ .

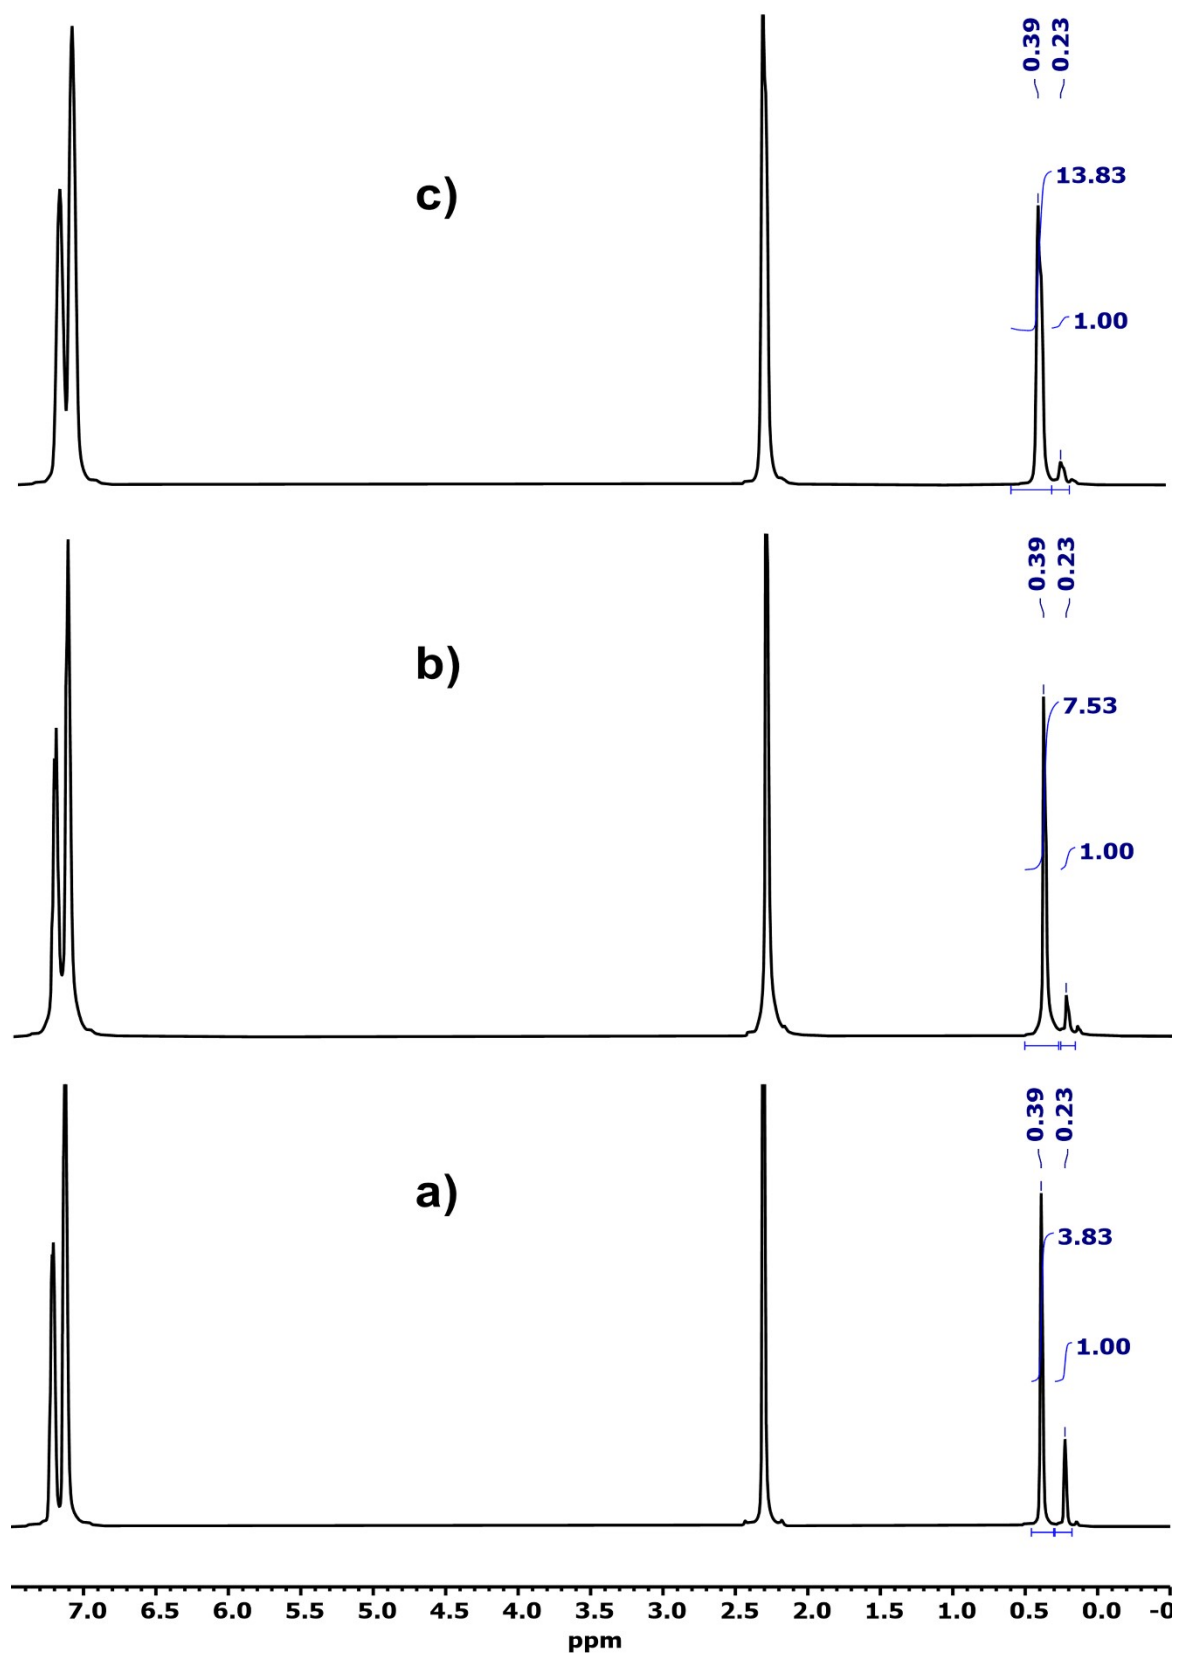

**Figure S5.**  $^1\text{H}$  NMR monitoring result of the condensation polymerisation of  $\text{Cl}_3\text{P}=\text{NSiMe}_3$  in the toluene reaction mixture at room temperature, **a)** 30<sup>th</sup> min., **b)** 60<sup>th</sup> min. and **c)** 90<sup>th</sup> min.
